# Supplementary material for: A Mobile Phone–Based Intervention to Reduce Mental Health Problems in Health Care Workers During the COVID-19 Pandemic (PsyCovidApp): Randomized Controlled Trial
Source: PubMed Central journal article supplement (PMC8133164; doi:10.2196/27039), 2021-05-18

## Multimedia Appendix 6. Credibility of Effect Modification Analyses (ICEMAN) instrument

### Credibility of Effect Modification Analyses (ICEMAN) instrument

#### 1: Was the direction of the effect modification correctly hypothesized a priori?

|                                                                                                              |                                                           |                                                                                                                                   |                                                                                                                                             |
|--------------------------------------------------------------------------------------------------------------|-----------------------------------------------------------|-----------------------------------------------------------------------------------------------------------------------------------|---------------------------------------------------------------------------------------------------------------------------------------------|
| <input type="checkbox"/> Definitely no                                                                       | <input type="checkbox"/> Probably no or unclear           | <input type="checkbox"/> Probably yes                                                                                             | <input checked="" type="checkbox"/> Definitely yes                                                                                          |
| <i>Clearly post-hoc or results inconsistent with hypothesized direction or biologically very implausible</i> | <i>Vague hypothesis or hypothesized direction unclear</i> | <i>No prior protocol available but unequivocal statement of a priori hypothesis with correct direction of effect modification</i> | <i>Prior protocol available and includes correct specification of direction of effect modification, e.g., based on a biologic rationale</i> |

Comment: Described in the protocol available at <https://www.medrxiv.org/content/10.1101/2020.11.03.20225102v1.full.pdf>

#### 2: Was the effect modification supported by prior evidence?

|                                                                              |                                                                                                                                       |                                                                                                                                                                             |                                                                                                                                                  |
|------------------------------------------------------------------------------|---------------------------------------------------------------------------------------------------------------------------------------|-----------------------------------------------------------------------------------------------------------------------------------------------------------------------------|--------------------------------------------------------------------------------------------------------------------------------------------------|
| <input type="checkbox"/> Inconsistent with prior evidence                    | <input type="checkbox"/> Little or no support or unclear                                                                              | <input type="checkbox"/> Some support                                                                                                                                       | <input checked="" type="checkbox"/> Strong support                                                                                               |
| <i>Prior evidence suggested a different direction of effect modification</i> | <i>No prior evidence or consistent with weak or very indirect prior evidence (e.g., animal study at high risk of bias) or unclear</i> | <i>Consistent with more limited or indirect prior evidence (e.g., large observational study, non-significant effect modification in prior RCT, or different population)</i> | <i>Consistent with strong prior evidence directly applicable to the clinical scenario (e.g., significant effect modification in related RCT)</i> |

Comment: Results supported by two recent RCTs assessing the effectiveness of a digital health intervention to promote mental health in the general population:

- Journal of affective disorders 2016; 203: 30-7.
- Journal of affective disorders 2019; 246: 695-705.

#### 3: Does a test for interaction suggest that chance is an unlikely explanation of the apparent effect modification? (consider irrespective of number of effect modifiers)

|                                                           |                                                                                                      |                                                            |                                                         |
|-----------------------------------------------------------|------------------------------------------------------------------------------------------------------|------------------------------------------------------------|---------------------------------------------------------|
| <input type="checkbox"/> Chance a very likely explanation | <input type="checkbox"/> Chance a likely explanation or unclear                                      | <input checked="" type="checkbox"/> Chance may not explain | <input type="checkbox"/> Chance an unlikely explanation |
| <i>Interaction p-value &gt;0.05</i>                       | <i>Interaction p-value ≤0.05 and &gt;0.01, or no test of interaction reported and not computable</i> | <i>Interaction p-value ≤0.01 and &gt;0.005</i>             | <i>Interaction p-value ≤0.005</i>                       |

Comment:

#### 4: Did the authors test only a small number of effect modifiers or consider the number in their statistical analysis?

|                                                                                                                                                       |                                                                                                   |                                                                                              |                                                                                                   |
|-------------------------------------------------------------------------------------------------------------------------------------------------------|---------------------------------------------------------------------------------------------------|----------------------------------------------------------------------------------------------|---------------------------------------------------------------------------------------------------|
| <input type="checkbox"/> Definitely no                                                                                                                | <input type="checkbox"/> Probably no or unclear                                                   | <input type="checkbox"/> Probably yes                                                        | <input checked="" type="checkbox"/> Definitely yes                                                |
| <i>Explicitly exploratory analysis or large number of effect modifiers tested (e.g., greater than 10) and multiplicity not considered in analysis</i> | <i>No mention of number or 4-10 effect modifiers tested and number not considered in analysis</i> | <i>No protocol available but unequivocal statement of 3 or fewer effect modifiers tested</i> | <i>Protocol available and 3 or fewer effect modifiers tested or number considered in analysis</i> |

Comment: Three effect modifiers tested

#### 5: If the effect modifier is a continuous variable, were arbitrary cut points avoided? not applicable: not continuous (for use of psychotherapy and of psychotropic medications)

|                                                                                                                      |                                                         |                                                                                 |                                                                                                  |
|----------------------------------------------------------------------------------------------------------------------|---------------------------------------------------------|---------------------------------------------------------------------------------|--------------------------------------------------------------------------------------------------|
| <input type="checkbox"/> Definitely no                                                                               | <input type="checkbox"/> Probably no or unclear         | <input checked="" type="checkbox"/> Probably yes                                | <input type="checkbox"/> Definitely yes                                                          |
| <i>Analysis based on exploratory cut point (e.g., picking cut point associated with highest interaction p-value)</i> | <i>Analysis based on cut point(s) of unclear origin</i> | <i>Analysis based on pre-specified cut points, e.g., suggested by prior RCT</i> | <i>Analysis based on the full continuum, e.g., assuming a linear or logarithmic relationship</i> |

Comment: For the only continuous effect modifier variable the cut point was based on statistical criteria (median)

#### 6 Optional: Are there any additional considerations that may increase or decrease credibility? (manual section 2.6)

Yes, probably decrease  Yes, probably increase

Comment: the effect modification is consistent across related outcomes

**7: How would you rate the overall credibility of the proposed effect modification?**

The overall rating should be driven by the items that decrease credibility. The following provides a sensible strategy:

- All responses definitely or probably reduced credibility or unclear → very low
- Two or more responses definitely reduced credibility → maximum usually low even if all other responses satisfy credibility criteria
- One response definitely reduced credibility → maximum usually moderate even if all other responses satisfy credibility criteria
- Two responses probably reduced credibility → maximum usually moderate even if all other responses satisfy credibility criteria
- No response options definitely or probably reduced credibility → high very likely

Place a mark on the continuous line (or type "x" in electronic version)

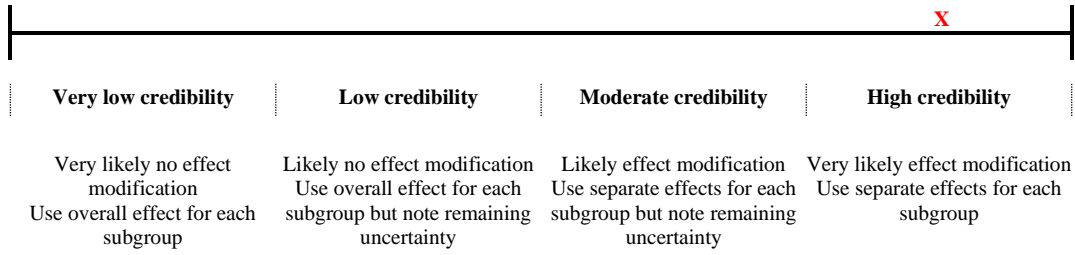

Supplement: mhealth_v9i5e27039_app6.pdf [file mhealth_v9i5e27039_app6.pdf]
