# Supplementary material for: A Mobile Phone–Based Intervention to Reduce Mental Health Problems in Health Care Workers During the COVID-19 Pandemic (PsyCovidApp): Randomized Controlled Trial
Source: PubMed Central journal article supplement (PMC8133164; doi:10.2196/27039), 2021-05-18
Supplement: mhealth_v9i5e27039_app3.pdf [file mhealth_v9i5e27039_app3.pdf]

**Multimedia Appendix 3. Subgroup analyses: comparison of outcome measures between the PsyCovidApp and the Control App groups at 2 weeks in prespecified subgroups (high DASS-21 baseline scores; users of psychotherapy; consumers of psychotropic medications)**

Table S5.1: DASS-21 baseline scores subgroups (high and low scores, with threshold based on median DASS-21 score)

|                                                                     |                                     | Sample of completers at follow-up (n=203)       |                                                     |         | Overall sample b (n=231)                        |                                                     |         | Interaction <sup>c</sup> |
|---------------------------------------------------------------------|-------------------------------------|-------------------------------------------------|-----------------------------------------------------|---------|-------------------------------------------------|-----------------------------------------------------|---------|--------------------------|
|                                                                     |                                     | Estimated mean difference (95% CI) <sup>a</sup> | Standardized group difference (95% CI) <sup>a</sup> | P value | Estimated mean difference (95% CI) <sup>a</sup> | Standardized group difference (95% CI) <sup>a</sup> | P value | P value                  |
| DASS-21 overall score                                               |                                     |                                                 |                                                     |         |                                                 |                                                     |         |                          |
|                                                                     | High baseline DASS-21 overall score | -1.49 (-4.05 to 1.08)                           | -0.08 (-0.20 to 0.06)                               | .13     | -1.42 (-4.02 to 1.17)                           | -0.07 (-0.20 to 0.063)                              | .15     | .20                      |
|                                                                     | Low baseline DASS-21 overall score  | -0.10 (-1.81 to 1.61)                           | -0.01 (-0.12 to 0.11)                               | .46     | -0.11 (-1.80 to 1.59)                           | -0.01 (-0.12 to 0.11)                               | .45     |                          |
| DASS-21- depression subscale                                        |                                     |                                                 |                                                     |         |                                                 |                                                     |         |                          |
|                                                                     | High baseline DASS-21 overall score | -0.11 (-1.06 to 0.84)                           | -0.01 (-0.14 to 0.11)                               | .41     | -0.01 (-1.06 to 0.96)                           | -0.01 (-0.13 to 0.11)                               | .43     | .35                      |
|                                                                     | Low baseline DASS-21 overall score  | 0.14 (-0.43 to 0.71)                            | 0.30 (-0.94 to 0.16)                                | .32     | 0.12 (-0.45 to 0.70)                            | 0.03 (-0.10 to 0.15)                                | .33     |                          |
| DASS-21- anxiety subscale                                           |                                     |                                                 |                                                     |         |                                                 |                                                     |         |                          |
|                                                                     | High baseline DASS-21 overall score | -0.69 (-1.57 to 0.19)                           | -0.10 (-0.23 to 0.03)                               | .06     | -0.66 (-1.54 to 0.23)                           | -0.10 (-0.23 to 0.03)                               | .41     | .07                      |
|                                                                     | Low baseline DASS-21 overall score  | 0.12 (-0.41 to 0.64)                            | 0.03 (-0.10 to 0.15)                                | .33     | 0.10 (-0.42 to 0.63)                            | 0.02 (-0.10 to 0.14)                                | .35     |                          |
| DASS-21- stress subscale                                            |                                     |                                                 |                                                     |         |                                                 |                                                     |         |                          |
|                                                                     | High baseline DASS-21 overall score | -0.73 (-1.84 to 0.39)                           | 0.09 (-0.22 to 0.05)                                | .10     | -0.75 (-1.88 to 0.39)                           | -0.09 (-0.22 to 0.05)                               | .12     | .31                      |
|                                                                     | Low baseline DASS-21 overall score  | 0.31 (-0.17 to 0.54)                            | -0.04 (-0.15 to 0.07)                               | .24     | -0.31 (-1.18 to 0.56)                           | -0.05 (-0.15 to 0.07)                               | .24     |                          |
| Posttraumatic stress disorder (DTS)                                 |                                     |                                                 |                                                     |         |                                                 |                                                     |         |                          |
|                                                                     | High baseline DASS-21 overall score | -0.44 (-5.03 to 4.15)                           | -0.01 (-0.12 to 0.10)                               | .43     | -0.57 (-5.15 to 4.00)                           | -0.01 (-0.12 to 0.10)                               | .43     | .36                      |
|                                                                     | Low baseline DASS-21 overall score  | 0.58 (-2.11 to 3.26)                            | 0.02 (-0.08 to 0.12)                                | .34     | 0.63 (-2.04 to 3.30)                            | 0.03 (-0.07 to 0.12)                                | .30     |                          |
| Burnout (MBI-HSS) emotional exhaustion subscale                     |                                     |                                                 |                                                     |         |                                                 |                                                     |         |                          |
|                                                                     | High baseline DASS-21 overall score | -0.37 (-3.30 to 2.56)                           | -0.01 (-0.13 to 0.10)                               | .40     | -0.23 (-3.13 to 2.67)                           | -0.03 (-0.13 to 0.10)                               | .34     | .26                      |
|                                                                     | Low baseline DASS-21 overall score  | 0.94 (-1.12 to 3.05)                            | 0.04 (-0.05 to 0.14)                                | .19     | 0.91 (-1.19 to 3.00)                            | 0.04 (-0.05 to 0.14)                                | .19     |                          |
| Burnout (MBI-HSS) professional accomplishment subscale <sup>d</sup> |                                     |                                                 |                                                     |         |                                                 |                                                     |         |                          |
|                                                                     | High baseline DASS-21 overall       | 0.43 (-1.20 to 2.06)                            | 0.03 (-0.09 to 0.15)                                | .30     | 0.39 (-1.27 to 2.06)                            | 0.06 (-0.09 to 0.15)                                | .23     | .05                      |

|  |                                              |                        |                        |     |                        |                        |     |     |
|--|----------------------------------------------|------------------------|------------------------|-----|------------------------|------------------------|-----|-----|
|  | score                                        |                        |                        |     | 2.05)                  |                        |     |     |
|  | Low baseline DASS-21 overall score           | -1.44 (-2.55 to -0.25) | -0.10 (-0.20 to -0.01) | .02 | -1.39 (-2.59 to -0.20) | -0.12 (-0.22 to -0.02) | .01 |     |
|  | Burnout (MBI-HSS) depersonalization subscale |                        |                        |     |                        |                        |     | .25 |
|  | High baseline DASS-21 overall score          | 0.46 (-0.45 to 0.67)   | 0.04 (-0.07 to 0.16)   | .24 | 0.42 (-0.83 to 1.67)   | 0.04 (-0.07 to 0.15)   | .23 |     |
|  | Low baseline DASS-21 overall score           | -0.11 (-1.01 to 0.79)  | -0.01 (-0.11 to 0.09)  | .41 | -0.11 (-1.01 to 0.79)) | -0.01 (-0.11 to 0.09)  | .40 |     |
|  | Insomnia (ISI)                               |                        |                        |     |                        |                        |     | .31 |
|  | High baseline DASS-21 overall score          | 0.45 (-0.86 to 1.75)   | 0.03 (-0.65 to 0.13)   | .25 | 0.40 (-0.90 to 1.70)   | 0.04 (-0.06 to 0.13)   | .23 |     |
|  | Low baseline DASS-21 overall score           | -0.03 (-0.99 to 0.94)  | -0.01 (-0.10 to 0.09)  | .48 | -0.03 (-1.00 to 0.93)  | -0.01 (-0.10 to 0.09)  | .47 |     |
|  | Self-efficacy (GSE) <sup>d</sup>             |                        |                        |     |                        |                        |     | .35 |
|  | High baseline DASS-21 overall score          | -0.62 (-1.74 to 0.51)  | -0.06 (-0.18 to 0.05)  | .14 | -0.68 (-1.82 to 0.46)  | -0.07 (-0.18 to 0.05)  | .13 |     |
|  | Low baseline DASS-21 overall score           | 0.19 (-0.72 to 1.09)   | 0.02 (-0.08 to 0.12)   | .34 | 0.20 (-0.69 to 1.10)   | 0.03 (-0.08 to 0.11)   | .31 |     |

*Data are adjusted estimated (unstandardized) and standardized between-group mean differences, with 95% Confidence Intervals (CIs) in parentheses. P values not adjusted for multiple testing. DASS-21, Depression, Anxiety and Stress Scale; DTS, Davidson Trauma Scale; MBI-HSS, Maslach Burnout Inventory - Human Services Survey; ISI, Insomnia Severity Index; GSE, General Self-Efficacy Scale.*

<sup>a</sup> Adjusted by baseline values

<sup>b</sup> Overall sample, derived by multiple imputation (50 imputations)

<sup>c</sup> Interaction *P* value for overall sample

<sup>d</sup> Scale scores were reversed to homogeneously convey that a negative difference favors the PsyCovidApp intervention

Table S5.2: Baseline use of psychotherapy (yes vs no)

|                                                                     |                          | Sample of completers at follow-up (n=40)        |                                                     |         | Overall sample <sup>b</sup> (n=43)              |                                                     |         | Interaction <sup>c</sup> |
|---------------------------------------------------------------------|--------------------------|-------------------------------------------------|-----------------------------------------------------|---------|-------------------------------------------------|-----------------------------------------------------|---------|--------------------------|
|                                                                     |                          | Estimated mean difference (95% CI) <sup>a</sup> | Standardized group difference (95% CI) <sup>a</sup> | P value | Estimated mean difference (95% CI) <sup>a</sup> | Standardized group difference (95% CI) <sup>a</sup> | P value | P value                  |
| DASS-21 overall score                                               |                          |                                                 |                                                     |         |                                                 |                                                     |         | .02                      |
|                                                                     | Psychotherapy users: Yes | -5.88 (-11.49 to -0.27)                         | -0.25 (-0.49 to -0.01)                              | .02     | -5.90 (-11.55 to -0.24)                         | -0.25 (-0.49 to -0.02)                              | .02     |                          |
|                                                                     | Psychotherapy users: No  | -0.26 (-1.81 to 1.28)                           | -0.01 (-0.09 to 0.07)                               | .37     | -0.26 (-1.82 to 1.30)                           | -0.01 (-0.09 to 0.07)                               | .39     |                          |
| DASS-21- depression subscale                                        |                          |                                                 |                                                     |         |                                                 |                                                     |         | .06                      |
|                                                                     | Psychotherapy users: Yes | -1.29 (-3.46 to 0.88)                           | -1.39 (-0.37 to 0.10)                               | .13     | -1.35 (-3.58 to 0.88)                           | -0.14 (-0.38 to 0.01)                               | .11     |                          |
|                                                                     | Psychotherapy users: No  | 0.16 (-0.38 to 0.70)                            | 0.02 (-0.06 to 0.10)                                | .28     | 0.19 (-0.35 to 0.74)                            | 0.02 (-0.06 to 0.10)                                | .30     |                          |
| DASS-21- anxiety subscale                                           |                          |                                                 |                                                     |         |                                                 |                                                     |         | .01                      |
|                                                                     | Psychotherapy users: Yes | -2.05 (-4.08 to -0.03)                          | -0.24 (-0.48 to 0.00)                               | .02     | -2.00 (-4.04 to 0.04)                           | -0.24 (-0.48 to 0.00)                               | .03     |                          |
|                                                                     | Psychotherapy users: No  | -0.08 (-0.58 to 0.42)                           | -0.01 (-0.10 to 0.07)                               | .38     | -0.07 (-0.58 to 0.44)                           | --0.01 (-0.10 to 0.07)                              | .37     |                          |
| DASS-21- stress subscale                                            |                          |                                                 |                                                     |         |                                                 |                                                     |         | .05                      |
|                                                                     | Psychotherapy users: Yes | -2.51 (-4.92 to -0.10)                          | -0.28 (-0.55 to -0.01)                              | .02     | -2.55 (-4.95 to -0.15)                          | -0.273 (-0.55 to 0.00)                              | .02     |                          |
|                                                                     | Psychotherapy users: No  | -0.37 (-1.09 to 0.36)                           | -0.04 (-0.12 to 0.04)                               | .16     | -0.38 (-1.10 to 0.35)                           | -0.04 (-0.12 to 0.04)                               | .15     |                          |
| Posttraumatic stress disorder (DTS)                                 |                          |                                                 |                                                     |         |                                                 |                                                     |         | .09                      |
|                                                                     | Psychotherapy users: Yes | -5.35 (-15.81 to 5.12)                          | -0.11 (-0.32 to 0.10)                               | .15     | -5.27 (-15.76 to 5.22)                          | -0.10 (-0.31 to 0.12)                               | .16     |                          |
|                                                                     | Psychotherapy users: No  | 0.70 (-1.94 to 3.28)                            | 0.02 (-0.05 to 0.08)                                | .31     | 0.58 (-1.92 to 3.27)                            | 0.02 (-0.05 to 0.08)                                | .30     |                          |
| Burnout (MBI-HSS) emotional exhaustion subscale                     |                          |                                                 |                                                     |         |                                                 |                                                     |         | .05                      |
|                                                                     | Psychotherapy users: Yes | -4.86 (-11.92 to 2.20)                          | -0.17 (-0.42 to 0.08)                               | .09     | -5.04 (-12.10 to 2.02)                          | -0.17 (-0.42 to 0.08)                               | .08     |                          |
|                                                                     | Psychotherapy users: No  | 0.84 (-0.97 to 2.65)                            | 0.03 (-0.04 to 0.11)                                | .18     | 0.88 (-0.95 to 2.71)                            | 0.04 (-0.04 to 0.11)                                | .17     |                          |
| Burnout (MBI-HSS) professional accomplishment subscale <sup>d</sup> |                          |                                                 |                                                     |         |                                                 |                                                     |         | .07                      |
|                                                                     | Psychotherapy users: Yes | -2.71 (-7.48 to 2.07)                           | -0.14 (-0.40 to 0.11)                               | .13     | -2.59 (-7.29 to 2.12)                           | -0.15 (-0.41 to 0.10)                               | .14     |                          |
|                                                                     | Psychotherapy users: No  | -0.31 (-1.30 to 0.67)                           | -0.03 (-0.11 to 0.06)                               | .27     | -0.27 (-1.23 to 0.70)                           | -0.02 (-0.10 to 0.06)                               | .29     |                          |

|                                              |                       |                       |     |                       |                       |     |  |     |
|----------------------------------------------|-----------------------|-----------------------|-----|-----------------------|-----------------------|-----|--|-----|
| Burnout (MBI-HSS) depersonalization subscale |                       |                       |     |                       |                       |     |  | .19 |
| Psychotherapy users: Yes                     | -0.76 (-3.12 to 1.59) | -0.06 (-0.26 to 0.13) | .26 | -0.74 (-3.09 to 1.61) | -0.07 (-0.26 to 0.13) | .26 |  |     |
| Psychotherapy users: No                      | 0.24 (-0.56 to 1.04)  | 0.02 (-0.06 to 0.10)  | .27 | 0.26 (-0.54 to 1.05)  | 0.02 (-0.06 to 0.10)  | .30 |  |     |
| Insomnia (ISI)                               |                       |                       |     |                       |                       |     |  | .03 |
| Psychotherapy users: Yes                     | -2.29 (-4.74 to 0.16) | -1.99 (-0.41 to 0.01) | .03 | -2.36 (-4.89 to 0.11) | -0.20 (-0.42 to 0.02) | .03 |  |     |
| Psychotherapy users: No                      | 0.40 (-0.43 to 1.23)  | 0.03 (-0.03 to 0.10)  | .17 | 0.37 (-0.45 to 1.19)  | 0.03 (-0.03 to 0.10)  | .16 |  |     |
| Self-efficacy (GSE) <sup>d</sup>             |                       |                       |     |                       |                       |     |  | .39 |
| Psychotherapy users: Yes                     | -0.76 (-3.26 to 1.75) | -0.08 (-0.34 to 0.18) | .27 | -0.77 (-3.31 to 1.78) | -0.08 (-0.34 to 0.18) | .27 |  |     |
| Psychotherapy users: No                      | -0.20 (-0.95 to 0.55) | -0.02 (-0.10 to 0.06) | .30 | -0.19 (-0.95 to 0.56) | -0.02 (-0.10 to 0.06) | .32 |  |     |

*Data are adjusted estimated (unstandardized) and standardized between-group mean differences, with 95% Confidence Intervals (CIs) in parentheses. P values not adjusted for multiple testing. DASS-21, Depression, Anxiety and Stress Scale; DTS, Davidson Trauma Scale; MBI-HSS, Maslach Burnout Inventory - Human Services Survey; ISI, Insomnia Severity Index; GSE, General Self-Efficacy Scale.*

<sup>a</sup> Adjusted by baseline values

<sup>b</sup> Overall sample, derived by multiple imputation (50 imputations)

<sup>c</sup> Interaction P value for Overall sample

<sup>d</sup> Scale scores were reversed to homogeneously convey that a negative difference favors the PsyCovidApp intervention

Table S5.3: Baseline consumption of psychotropic medications (yes vs no)

|                                                                     |                              | Sample of completers at follow-up (n=74)        |                                                     |         | Overall sample <sup>b</sup> (n=79)              |                                                     |         | Interaction <sup>c</sup> |
|---------------------------------------------------------------------|------------------------------|-------------------------------------------------|-----------------------------------------------------|---------|-------------------------------------------------|-----------------------------------------------------|---------|--------------------------|
|                                                                     |                              | Estimated mean difference (95% CI) <sup>a</sup> | Standardized group difference (95% CI) <sup>a</sup> | P value | Estimated mean difference (95% CI) <sup>a</sup> | Standardized group difference (95% CI) <sup>a</sup> | P value | P value                  |
| DASS-21 overall score                                               |                              |                                                 |                                                     |         |                                                 |                                                     |         | .01                      |
|                                                                     | Psychotropic medication: Yes | -5.22 (-8.74 to -1.69)                          | -0.29 (-0.48 to -0.09)                              | <.01    | -5.18 (-8.69 to -1.67)                          | -0.28 (-0.48 to -0.09)                              | <.01    |                          |
|                                                                     | Psychotropic medication: No  | 0.10 (-1.54 to 1.74)                            | 0.01 (-0.08 to 0.09)                                | .45     | 0.09 (-1.59 to 1.77)                            | 0.01 (-0.08 to 0.09)                                | .45     |                          |
| DASS-21- depression subscale                                        |                              |                                                 |                                                     |         |                                                 |                                                     |         | .06                      |
|                                                                     | Psychotropic medication: Yes | -1.07 (-2.61 to 0.46)                           | -0.14 (-0.35 to 0.06)                               | .08     | -1.11 (-2.65 to 0.43)                           | -0.14 (-0.35 to 0.06)                               | .08     |                          |
|                                                                     | Psychotropic medication: No  | 0.22 (-0.34 to 0.79)                            | 0.03 (-0.05 to 0.12)                                | .50     | 0.24 (-0.33 to 0.81)                            | 0.03 (-0.05 to 0.12)                                | .22     |                          |
| DASS-21- anxiety subscale                                           |                              |                                                 |                                                     |         |                                                 |                                                     |         | <.001                    |
|                                                                     | Psychotropic medication: Yes | -1.94 (-3.34 to -0.55)                          | -0.26 (-0.45 to -0.08)                              | <.01    | -1.94 (-3.34 to -0.54)                          | -0.26 (-0.45 to -0.07)                              | <.01    |                          |
|                                                                     | Psychotropic medication: No  | 0.08 (-0.43 to 0.60)                            | 0.01 (-0.08 to 0.10)                                | .37     | 0.09 (-0.42 to 0.60)                            | 0.01 (-0.07 to 0.10)                                | .37     |                          |
| DASS-21- stress subscale                                            |                              |                                                 |                                                     |         |                                                 |                                                     |         | .02                      |
|                                                                     | Psychotropic medication: Yes | -2.19 (-3.71 to -0.67)                          | -0.30 (-0.50 to -0.09)                              | <.01    | -2.25 (-3.77 to -0.72)                          | -0.30 (-0.50 to -0.09)                              | <.01    |                          |
|                                                                     | Psychotropic medication: No  | -0.22 (-0.99 to 0.55)                           | -0.02 (-0.11 to 0.06)                               | .29     | -0.19 (-0.95 to 0.56)                           | -0.02 (-0.11 to 0.06)                               | .29     |                          |
| Posttraumatic stress disorder (DTS)                                 |                              |                                                 |                                                     |         |                                                 |                                                     |         | <.001                    |
|                                                                     | Psychotropic medication: Yes | -8.65 (-16.06 to -1.23)                         | -0.20 (-0.37 to -0.03)                              | .01     | -8.80 (-16.26 to -1.33)                         | -0.20 (-0.37 to -0.03)                              | .01     |                          |
|                                                                     | Psychotropic medication: No  | 1.90 (-0.78 to 4.58)                            | 0.05 (-0.02 to 0.12)                                | .08     | 1.98 (-0.69 to 4.65)                            | 0.05 (-0.02 to 0.12)                                | .09     |                          |
| Burnout (MBI-HSS) emotional exhaustion subscale                     |                              |                                                 |                                                     |         |                                                 |                                                     |         | .07                      |
|                                                                     | Psychotropic medication: Yes | -2.64 (-7.55 to 2.27)                           | -0.11 (-0.32 to 0.10)                               | .14     | -2.78 (-7.71 to 2.16)                           | -0.12 (-0.32 to 0.09)                               | .13     |                          |
|                                                                     | Psychotropic medication: No  | 0.91 (-0.94 to 2.76)                            | 0.37 (-0.04 to 0.11)                                | .17     | 0.93 (-0.90 to 2.75)                            | 0.37 (-0.04 to 0.11)                                | .16     |                          |
| Burnout (MBI-HSS) professional accomplishment subscale <sup>d</sup> |                              |                                                 |                                                     |         |                                                 |                                                     |         | .45                      |
|                                                                     | Psychotropic medication: Yes | -0.67 (-3.25 to 1.90)                           | -0.05 (-0.24 to 0.14)                               | .30     | -0.61 (-3.20 to 1.98)                           | -0.05 (-0.24 to 0.14)                               | .30     |                          |
|                                                                     | Psychotropic medication: No  | -0.54 (-1.63 to 0.55)                           | -0.04 (-0.13 to 0.04)                               | .17     | -0.51 (-1.62 to 0.59)                           | -0.04 (-0.12 to 0.04)                               | .17     |                          |

|                                              |                        |                        |     |                        |                        |  |     |     |
|----------------------------------------------|------------------------|------------------------|-----|------------------------|------------------------|--|-----|-----|
| Burnout (MBI-HSS) depersonalization subscale |                        |                        |     |                        |                        |  |     | .26 |
| Psychotropic medication: Yes                 | -0.37 (-2.54 to 1.80)  | -0.04 (-0.25 to 0.18)  | .37 | -0.38 (-2.56 to 1.79)  | -0.04 (-0.25 to 0.17)  |  | .36 |     |
| Psychotropic medication: No                  | 0.29 (-0.51 to 1.08)   | 0.03 (-0.05 to 0.11)   | .36 | 0.29 (-0.53 to 1.11)   | 0.03 (-0.05 to 0.10)   |  | .25 |     |
| Insomnia (ISI)                               |                        |                        |     |                        |                        |  |     | .01 |
| Psychotropic medication: Yes                 | -2.10 (-3.92 to -0.27) | -0.16 (-0.30 to -0.02) | .01 | -2.08 (-3.92 to -0.24) | -0.16 (-0.30 to -0.02) |  | .01 |     |
| Psychotropic medication: No                  | 0.53 (-0.29 to 1.39)   | 0.06 (-0.03 to 0.13)   | .08 | 0.55 (-0.31 to 1.41)   | 0.05 (-0.02 to 0.12)   |  | .09 |     |
| Self-efficacy (GSE) <sup>d</sup>             |                        |                        |     |                        |                        |  |     | .49 |
| Psychotropic medication: Yes                 | -0.11 (-1.89 to 1.66)  | -0.01 (-0.21 to 0.19)  | .45 | -0.08 (-1.85 to 1.67)  | -0.01 (-0.21 to 0.19)  |  | .45 |     |
| Psychotropic medication: No                  | -0.23 (-1.01 to 0.54)  | -0.02 (-0.11 to 0.06)  | .27 | -0.23 (-0.98 to 0.55)  | -0.03 (-0.11 to 0.06)  |  | .27 |     |

Data are adjusted estimated (unstandardized) and standardized between-group mean differences, with 95% Confidence Intervals (CIs) in parentheses. P values not adjusted for multiple testing. DASS-21, Depression, Anxiety and Stress Scale; DTS, Davidson Trauma Scale; MBI-HSS, Maslach Burnout Inventory - Human Services Survey; ISI, Insomnia Severity Index; GSE, General Self-Efficacy Scale; SD, standard deviation.

<sup>a</sup> Adjusted by baseline values

<sup>b</sup> Overall sample, derived by multiple imputation (50 imputations)

<sup>c</sup> Interaction P value for overall sample

<sup>d</sup> Scale scores were reversed to homogeneously convey that a negative difference favors the PsyCovidApp intervention
