# Supplementary material for: A Mobile Phone–Based Intervention to Reduce Mental Health Problems in Health Care Workers During the COVID-19 Pandemic (PsyCovidApp): Randomized Controlled Trial
Source: PubMed Central journal article supplement (PMC8133164; doi:10.2196/27039), 2021-05-18
Supplement: mhealth_v9i5e27039_app4.pdf [file mhealth_v9i5e27039_app4.pdf]

#### Multimedia Appendix 4. Number of health care workers recruited by Spanish region

|                                       | Number of health care workers (%) | Prevalence of COVID-19 cases at the onset of the recruitment period <sup>a</sup> |
|---------------------------------------|-----------------------------------|----------------------------------------------------------------------------------|
| Illes Balears                         | 114 (23.65%)                      | 0.18% (2,090/1,149,460)                                                          |
| Cataluña                              | 69 (14.32%)                       | 0.54% (41,573/7,675,217)                                                         |
| Comunidad de Madrid                   | 64 (13.28%)                       | 0.97% (64,408/6,663,394)                                                         |
| Castilla y León                       | 58 (12.03%)                       | 0.97% (23,192/2,399,548)                                                         |
| Andalucía                             | 46 (9.54%)                        | 0.18% (15,466/8,414,240)                                                         |
| Aragón                                | 39 (8.09%)                        | 0.51% (6,767/1,319,291)                                                          |
| Comunitat Valenciana                  | 34 (7.05%)                        | 0.28% (13,779/5,003,769)                                                         |
| Castilla-La Mancha                    | 15 (3.11%)                        | 0.27% (20,477/7,675,217)                                                         |
| Galicia                               | 15 (3.11%)                        | 0.36% (9,838/2,699,499)                                                          |
| País Vasco                            | 12 (2.49%)                        | 0.61% (13,543/2,207,776)                                                         |
| Comunidad Foral de Navarra            | 5 (1.04%)                         | 0.97% (6,340/654,214)                                                            |
| Extremadura                           | 3 (0.62%)                         | 0.46% (4,960/1,067,710)                                                          |
| Región de Murcia                      | 3 (0.62%)                         | 0.15% (2,307/1,493,898)                                                          |
| Ciudades autónomas de Ceuta y Melilla | 2 (0.41%)                         | 0.17% (299/171,264)                                                              |
| La Rioja                              | 2 (0.41%)                         | 1.24% (3,940/316,798)                                                            |
| Principado de Asturias                | 1 (0.21%)                         | 0.26% (2,690/1,022,800)                                                          |
| Canarias                              | 0 (0%)                            | 0.11% (2,312/2,153,389)                                                          |
| Cantabria                             | 0 (0%)                            | 0.45% (2,630/581,078)                                                            |
| Total                                 | 482 (100%)                        | 0.50% (236,611/47,026,208)                                                       |

*Healthcare workers were recruited between 14 May 2020 and 25 July 2020. Almost two thirds of the participants (63%) belonged to four of the 17 regions in Spain. The unequal distribution of health care workers across the Spanish regions indicates that the recruitment strategy did not homogeneously reach all the regions.*

<sup>a</sup> Computed based on the number of COVID-19 cases notified in Spain on 14 May 2020 (source: Informe sobre la situación de COVID-19 en España Informe COVID-19 n° 31. 14 de mayo de 2020. Available at: <https://www.isciii.es/QueHacemos/Servicios/VigilanciaSaludPublicaRENAVE/EnfermedadesTransmisibles/Paginas/-COVID-19.-Informes-previos.aspx>) and number of inhabitants (source: Spanish National Institute of Statistics (available at: [https://www.ine.es/dyngs/INEbase/es/operacion.htm?c=Estadistica\\_C&cid=1254736177011&menu=resuItados&secc=1254736195458&idp=1254734710990](https://www.ine.es/dyngs/INEbase/es/operacion.htm?c=Estadistica_C&cid=1254736177011&menu=resuItados&secc=1254736195458&idp=1254734710990)))
