# Supplementary material for: A Mobile Phone–Based Intervention to Reduce Mental Health Problems in Health Care Workers During the COVID-19 Pandemic (PsyCovidApp): Randomized Controlled Trial
Source: PubMed Central journal article supplement (PMC8133164; doi:10.2196/27039), 2021-05-18
Supplement: mhealth_v9i5e27039_app5.pdf [file mhealth_v9i5e27039_app5.pdf]

## Multimedia Appendix 5. Trial results reported in terms of adjusted mean between-group differences (overall sample)

Table S4.1: Comparison of outcome measures between the PsyCovidApp intervention and the Control App groups at 2 weeks in the overall sample

|                                                            | Adjusted between-group mean differences (95% CI) <sup>a</sup> |                                     |
|------------------------------------------------------------|---------------------------------------------------------------|-------------------------------------|
|                                                            | Sample of completers at follow-up (n=436)                     | Overall sample <sup>b</sup> (n=482) |
| DASS-21 – overall score                                    | -0.78 (-0.28 to 0.72)                                         | -0.74 (-0.23 to 0.75)               |
| DASS-21- depression                                        | 0.26 (-0.52 to 0.56)                                          | 0.26 (-0.52 to 0.57)                |
| DASS-21- anxiety                                           | -0.26 (-0.76 to 0.23)                                         | -0.29 (-0.79 to 0.21)               |
| DASS-21- stress                                            | -0.57 (-1.26 to 0.13)                                         | -0.58 (-1.27 to 0.12)               |
| Posttraumatic stress disorder (DTS)                        | 0.08 (-2.48 to 2.64)                                          | 0.04 (-2.53 to 2.60)                |
| Burnout (MBI-HSS) emotional exhaustion                     | 0.29 (-1.48 to 2.05)                                          | 0.26 (-1.51 to 2.02)                |
| Burnout (MBI-HSS) professional accomplishment <sup>c</sup> | -0.57 (-1.57 to 0.43)                                         | -0.55 (-1.55 to 0.45)               |
| Burnout (MBI-HSS) depersonalization                        | 0.14 (-0.62 to 0.90)                                          | 0.14 (-0.63 to 0.90)                |
| Insomnia (ISI)                                             | 0.12 (-0.67 to 0.91)                                          | 0.14 (-0.66 to 0.94)                |
| Self-efficacy (GSE) <sup>c</sup>                           | -0.23 (-0.94 to 0.48)                                         | -0.24 (-0.96 to 0.47)               |

Data are adjusted between-group mean differences, with 95% Confidence Intervals (CIs) in parentheses. DASS-21, Depression, Anxiety and Stress Scale; DTS, Davidson Trauma Scale; MBI-HSS, Maslach Burnout Inventory - Human Services Survey; ISI, Insomnia Severity Index; GSE, General Self-Efficacy Scale.

<sup>a</sup> Adjusted by baseline values

<sup>b</sup> Overall sample, derived by multiple imputation (50 imputations)

<sup>c</sup> Scale scores were reversed to homogeneously convey that a negative difference favors the PsyCovidApp intervention
